# Supplementary material
Source: PubMed Central journal article supplement (PMC6178445)
Supplement: rstb20170312supp1.pdf [file rstb20170312supp1.pdf]

# Quantifying the immediate carbon emissions from El Niño mediated wildfires in humid tropical forests

Kieran Withey<sup>\*1</sup>, Erika Berenguer<sup>1,2</sup>, Alessandro Ferraz Palmeira<sup>3</sup>, Fernando D. B. Espírito-Santo<sup>4</sup>, Gareth Lennox<sup>1</sup>, Camila V. J. Silva<sup>1</sup>, Luiz E. O. C. Aragão<sup>5,6</sup>, Joice Ferreira<sup>7</sup>, Filipe França<sup>1,7,8</sup>, Yadvinder Malhi<sup>2</sup>, Liana Chesini Rossi<sup>9</sup>, Jos Barlow<sup>1</sup>

<sup>1</sup>Lancaster Environment Centre, Lancaster University, Bailrigg, Lancaster, Lancaster LA1 4YQ, UK.

<sup>2</sup>Environmental Change Institute, University of Oxford, Oxford, OX1 3QY, UK.

<sup>3</sup>Instituto de Ciências Biológicas, Universidade Federal do Pará, Rua Augusto Corrêa, 01, Campus Guamá, Belém-Pará, Brazil - CEP: 66075-110.

<sup>4</sup>Centre for Landscape and Climate Research (CLCR) and Leicester Institute of Space and Earth Observation (LISEO), School of Geography, Geology and Environment, University of Leicester, University Road, Leicester, LE1 7RH.

<sup>5</sup>Remote Sensing Division, National Institute for Space Research, Av. dos Astronautas, 1.758, 12227-010 São José dos Campos, Brazil.

<sup>6</sup>College of Life and Environmental Sciences, University of Exeter, Exeter EX4 4RJ, UK.

<sup>7</sup>Embrapa Amazônia Oriental, Trav. Dr. Enéas Pinheiro, s/n, CP 48, 66095-100, Belém, PA, Brazil.

<sup>8</sup>Instituto Federal de Minas Gerais, Rodovia Bambuí/Medeiros, Km-05, 38900-000, Bambuí, MG, Brazil.

<sup>9</sup>Departamento de Ecologia, Universidade Estadual Paulista, 13506-900, Rio Claro, SP, Brazil.

**Keywords:** (1) ENSO; (2) forest degradation; (3) climate change; (4) necromass; (5) woody debris; (6) forest disturbance

\*Author for correspondence (kieranwithey@gmail.com).

## Supplementary material

### Table of contents:

1. Figure S1
2. Figure S2
3. Carbon estimates
4. Table S1
5. Table S2

6. Burned area estimation
7. GFED and GFAS comparison methods
8. Supplementary results

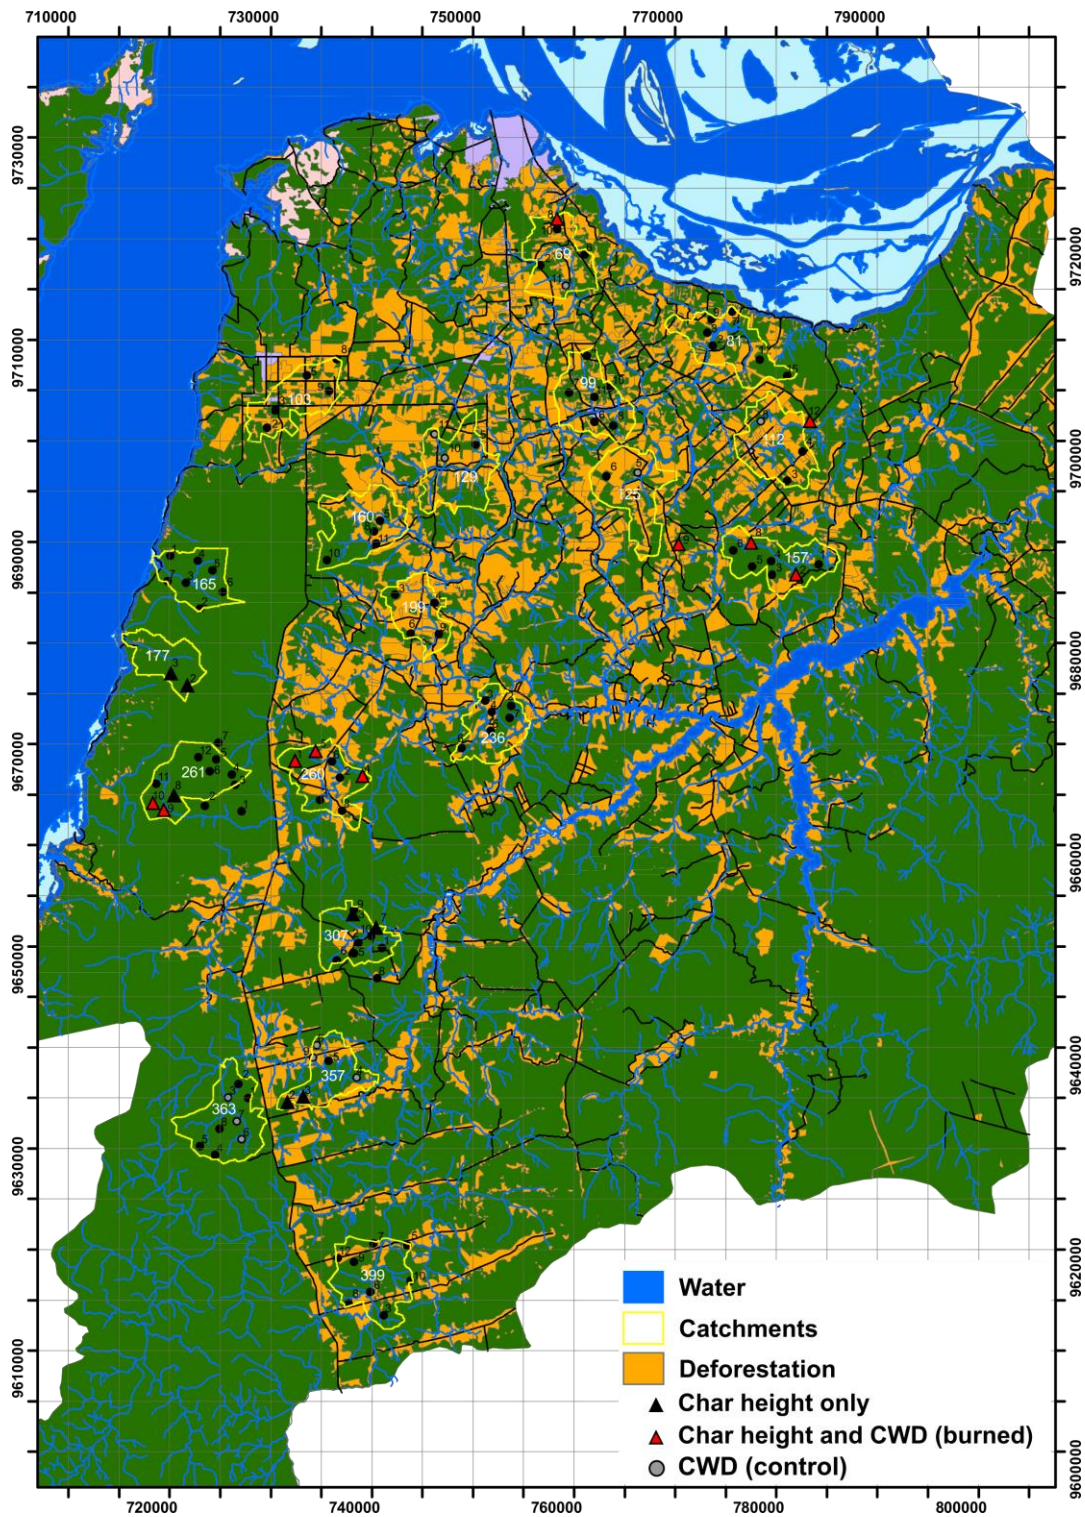

**Figure S1.** Plot location in the municipalities of Belterra, Mojuí dos Campos and Santarém in the Brazilian Amazon. Necromass was assessed in 113 forest plots in 2010. CWD was monitored in 18 of these plots until 2016. Char height was assessed in 17 plots that burned during the 2015-16 El Niño.

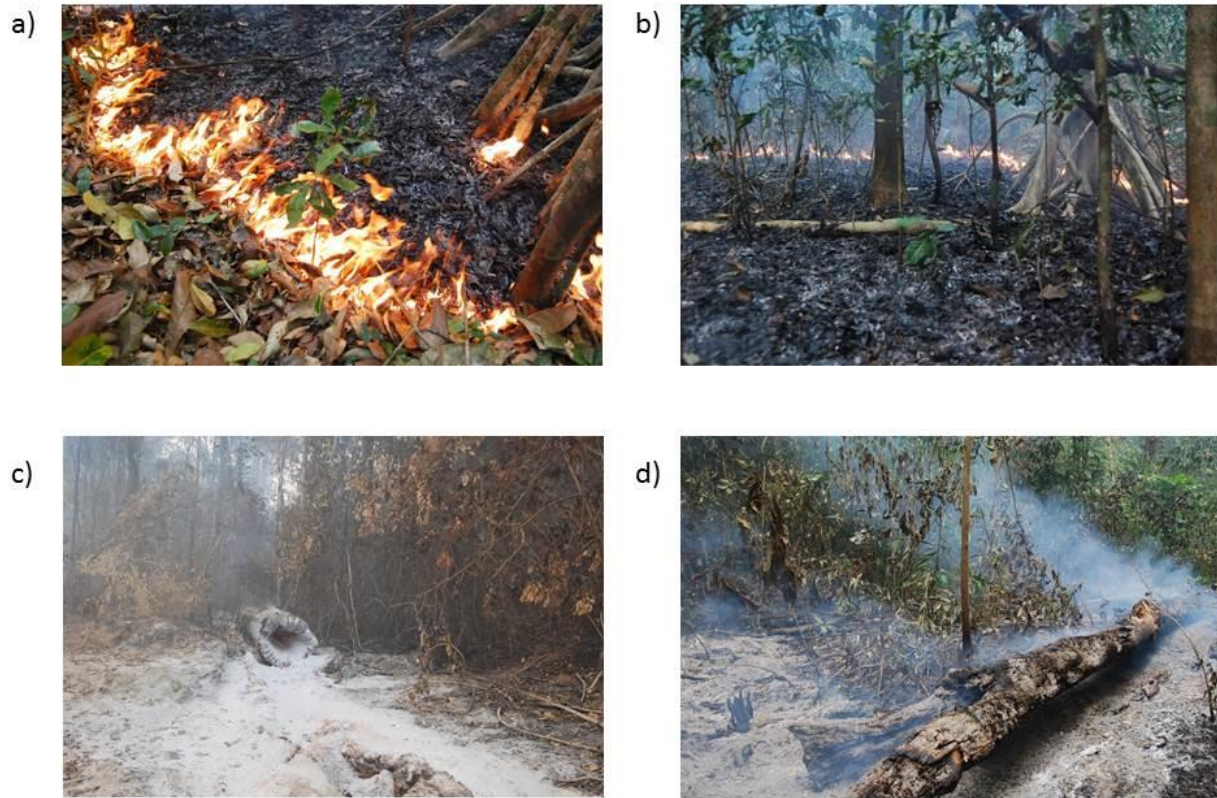

**Figure S2.** Personal observations of combustion completeness. A-B) The forest floor immediately after the fireline has passed in a previously logged forest. C-D) Smoldering coarse woody debris surrounded by a forest floor covered in ashes. All photos were taken during the 2015-16 El Niño in the Santarém region by E. Berenguer.

### 3. Carbon estimates

**Total aboveground biomass (TAGB):** TAGB of the large vegetation ( $\geq 10$  cm) was estimated at each of the sampled forest sites following Hughes et al. [1] with the model:

$$\text{TAGB}_t = \text{TAGB}_{\max} (1 - \exp(-b_1 \times t))^{b_2}$$

where  $\text{TAGB}_t$  represents the total aboveground biomass at a given time;  $\text{TAGB}_{\max}$  is the potential maximum of TAGB;  $b_1$  controls the mean annual ABA, while  $b_2$  controls the inflection point of the accumulation curve.

**Biomass of dead palms:** The biomass of dead palms was calculated by using the Cummings et al. [2] allometric equations:

$$[(\exp(1.321 \times \ln(D^2) + 3.2758)) \times 1.0931] / 10^6 \text{ for small palms } (<10 \text{ cm DBH}); \text{ and}$$

$$((\pi r^2 \times H) \times \text{sg}_) / 10^6 \text{ for large palms } (\geq 10 \text{ cm DBH});$$

where  $D$  represents the DBH (cm);  $H$  is the height (m);  $\text{sg}_$  is the specific gravity of wood ( $\text{g cm}^{-3}$ ) and  $r$  is the radius (cm).

**Coarse woody debris (CWD):** We estimated the volumes of each CWD piece by applying the Smalian's formula [3]:

$$V = L_{\text{CWD}} [(\pi(D_1/2)^2 + \pi(D_2/2)^2) / 2]$$

Where  $L_{\text{CWD}}$  (m) represents the length of a CWD piece, and  $D$  the diameter (cm) at either end.

**Table S1.** Forest classes included in each scenario and their associated sample sizes.

| <b>Scenario</b> | <b>FL<sub>CWD</sub></b>               | <b>CC<sub>CWD</sub></b>              | <b>D<sub>CWD</sub></b>               | <b>FL<sub>LLFWD</sub></b>             | <b>BA</b>                             |
|-----------------|---------------------------------------|--------------------------------------|--------------------------------------|---------------------------------------|---------------------------------------|
| Prim1           | All primary classes (n=74)            | All primary classes (n=7)            | All primary classes (n=7)            | All primary classes (n=74)            | All primary classes (n=15)            |
| Prim2           | Disturbed primary classes only (n=57) | Disturbed primary classes only (n=5) | Disturbed primary classes only (n=4) | Disturbed primary classes only (n=57) | Disturbed primary classes only (n=10) |
| Sec1            | Secondary forests only (n=39)         | All primary classes (n=7)            | All classes (n=10)                   | Secondary forests only (n=39)         | All classes (n=17)                    |
| Sec2            | Secondary forests only (n=39)         | All primary classes (n=7)            | Secondary forests only (n=3)         | Secondary forests only (n=39)         | Secondary forests only (n=2)          |

**Table S2.** Landsat scenes and dates that were used.

| <b>227/062</b>    | <b>227/63</b>     | <b>228/062</b>    | <b>228/063</b>    |
|-------------------|-------------------|-------------------|-------------------|
| L5 TM 07/31/2010  | L5 TM 07/31/2010  | L5 TM 07/22/2010  | L5 TM 07/22/2010  |
| L5 TM 06/16/2011  | L5 TM 06/16/2011  | L5 TM 06/07/2011  | L5 TM 08/10/2011  |
| L7 ETM 07/28/2012 | L7 ETM 07/28/2012 | L7 ETM 09/21/2012 | L7 ETM 08/20/2012 |
| L7 ETM 09/14/2012 | L7 ETM 09/14/2012 | L7 ETM 10/23/2012 | L7 ETM 10/23/2012 |
| L7 ETM 17/11/2012 | L7 ETM 30/09/2012 | L7 ETM 11/24/2012 | L7 ETM 12/10/2012 |
| L8 OLI 09/25/2013 | L8 OLI 09/25/2013 | L8 OLI 09/16/2013 | L8 OLI 06/28/2013 |
| L8 OLI 08/30/2014 | L8 OLI 07/10/2014 | L8 OLI 15/08/2013 | L8 OLI 06/15/2014 |
| L8 OLI 10/30/2014 | L8 OLI 03/23/2015 | L8 OLI 06/15/2014 | L8 OLI 05/17/2015 |
| L8 OLI 01/02/2015 | L8 OLI 06/27/2015 | L8 OLI 05/17/2015 | L8 OLI 07/20/2015 |
| L8 OLI 07/29/2015 | L8 OLI 07/29/2015 | L8 OLI 06/02/2015 | L8 OLI 07/06/2016 |
| L8 OLI 06/29/2016 | L8 OLI 07/31/2016 | L8 OLI 06/18/2015 | L8 OLI 08/07/2016 |
| L8 OLI 08/16/2016 | L8 OLI 08/16/2016 | L8 OLI 09/24/2016 |                   |

## 6. Burned area estimation

For our burned area estimation, we used 48 Landsat images (Table S2) from Landsat 5, 7, and 8 between the years 2010 and 2016. These images covered an area of 6.48 million ha and included 14 municipalities in central-eastern Amazonia: Aveiro, Barreirinha, Belterra, Itaituba, Juruti, Mojuí dos Campos, Monte Alegre, Nhamundá, Parintins, Placas, Prainha, Rurópolis, Santarém, and Uruará. We performed pixel-by-pixel unsupervised k-means classifications (MacQUEEN, 1967, Drake and Jonathan, 2012) of each Landsat image with six classes and 10 interactions in ERDAS IMAGE v.16 (2016), to classify primary forest (including both undisturbed and disturbed), secondary forest, burn scars (from the 2015-16 El Niño-mediated fires), deforested areas, bodies of water, and non-forest (figure 1). We used the following as input variables: spectral bands including the visible to the medium infrared, Normalised Difference Vegetation Index (NDVI), Soil Adjusted Vegetation Index (SAVI), Enhanced Vegetation Index (EVI), and the Normalised Burn Ratio 2 (NBR2) [34]. Imagery from Landsat 7 and 8 were used in combination with the panchromatic band (Landsat 7 & 8) to improve their spatial resolution. The classified rasters were then imported and vectorised in ArcGIS v.10.2 (ESRI 2014), where a visual inspection of the automatic classification was made to correct any classification errors. Each individual band and all possible combinations in RGB composites were used to identify classifier errors. Following the correction of these errors, we calculated the cumulative area of primary and secondary forest that experienced understorey wildfires during 2015-16 in the Santarém region (figure 1).



## 7. GFED and GFAS comparison methods

We compared our CO<sub>2</sub> emission estimates to two fire emissions databases frequently used in Earth Systems models and carbon budgets. First, we compared our estimates to those of the Global Fire Emissions Database version 4.1s (GFED4.1s) (van der Werf et al. 2017), which is based on the MODIS burned area algorithm of Giglio et al. (2013) and is boosted for small fires using active fire estimates following Randerson et al. (2012). Second, we compared our estimates to those of the Global Fire Assimilation System (GFAS) version 1.1 (Kaiser et al. 2012).

We acquired GFED4.1s data files for the year 2015 and 2016 in the .hdf5 format from the following URL: <https://www.geo.vu.nl/~gwerf/GFED/GFED4/>. We then extracted the monthly emissions layers for our study period (August 2015 – July 2016) from these files and cropped them to our study region in central-eastern Amazonia. For each month, we calculated the per cell carbon emissions. We then downscaled the resolution, corrected the cell values accordingly, and finally re-cropped to our study area to avoid overestimating the emissions due to the mismatch in the resolutions between the GFED data and our own. Finally, we summed all cells across all months to calculate the cumulative carbon emissions for our study region and period.

We acquire Wildfire flux of Carbon Dioxide files from the European Centre for Medium-Range Weather Forecasts (ECMWF) from the following URL: <http://apps.ecmwf.int/datasets/data/cams-gfas/>.

## 8. Supplementary results

**(a)** Time into study period (i.e. fire season) was not correlated with char height, our proxy for fire intensity ( $r = 0.06$ ; d.f. = 7;  $P = 0.88$ ). Though it must be noted that date of burn is only an approximate estimate.

**(b)** Time in to study period (i.e. fire season) was not correlated to our estimate of plot-level burn area ( $r = -0.31$ ; d.f. = 7;  $P = 0.42$ ). Though it must be noted that date of burn is only an approximate estimate

**(c)** Time into study period was not correlated with our combines estimate of necromass (leaf litter, FWD, and CWD) combustion completeness ( $r = 0.13$ ; d.f. = 5;  $P = 0.78$ ). Though it must be noted we only have approximate dates for the seven plots for which we have combustion completeness values.

**(d)** Pre-El Niño necromass stocks were not correlated with char height, our proxy for fire intensity ( $r = 0.29$ ; d.f. = 5;  $P = 0.52$ ). Though it must be noted we only have approximate dates for the seven plots for which we have pre-El Niño necromass stock values.

## References

1. Hughes RF, Kauffman JB, Jaramillo VJ. 1999 BIOMASS, CARBON, AND NUTRIENT DYNAMICS OF SECONDARY FORESTS IN A HUMID TROPICAL REGION OF MÉXICO. *Ecology* **80**, 1892–1907. (doi:10.1890/0012-9658(1999)080[1892:BCANDO]2.0.CO;2)
2. Cummings DL, Boone Kauffman J, Perry DA, Flint Hughes R. 2002 Aboveground biomass and structure of rainforests in the southwestern Brazilian Amazon. *For. Ecol. Manage.* **163**, 293–307. (doi:10.1016/S0378-1127(01)00587-4)
3. Chao K-J, Phillips OL, Baker TR, Peacock J, Lopez-Gonzalez G, Vásquez Martínez R, Monteagudo A, Torres-Lezama A. 2009 After trees die: quantities and determinants of necromass across Amazonia. *Biogeosciences* **6**, 1615–1626. (doi:10.5194/bg-6-1615-2009)
